# Supplementary material
Source: PubMed Central journal article supplement (PMC4790677)
Supplement: milg001892.w2_default.pdf [file milg001892.w2_default.pdf]

**APPENDIX FIGURE 1: Difference in the Distributions of Hemoglobin Concentrations between Baseline and Follow-up by Experiment Arm Relative to Control**

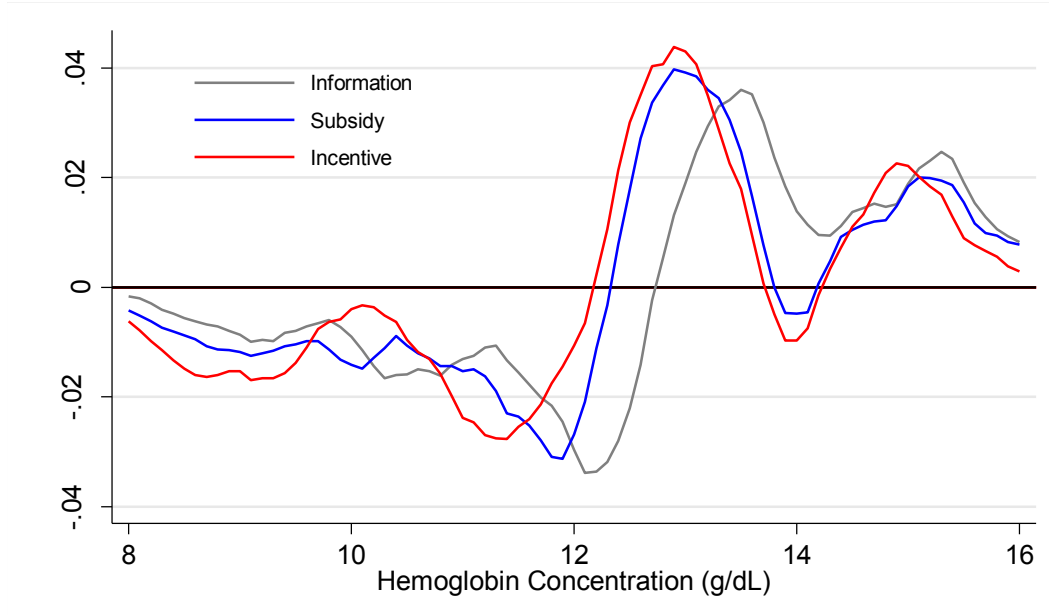

**Note:** Each line in the figure represents the change between the baseline and follow-up hemoglobin distributions in the indicated intervention arm relative to the change in the control group. By construction, this difference is zero across the Hb concentration distribution, thus the control group is represented by the horizontal axis.
